# Supplementary material for: Visual Impairment, Eye Conditions, and Diagnoses of Neurodegeneration and Dementia
Source: PubMed Central journal article supplement (PMC11289698; doi:10.1001/jamanetworkopen.2024.24539), 2024-07-30

## Supplementary Online Content

Ferguson EL, Thoma M, Buto PT, et al. Visual impairment, eye conditions, and diagnoses of neurodegeneration and dementia. *JAMA Netw Open.* 2024;7(7):e2424539. doi:10.1001/jamanetworkopen.2024.24539

**eTable 1.** *International Classification of Diseases (ICD) Codes Used to Extract Additional AD and ADRD diagnoses From Primary Care and In-Patient Electronic Health Records Through 2021*

**eTable 2.** SNPs and Their Log OR Effect Estimates Included in the Primary Cataracts-GRS

**eTable 3.** SNPs and Their Log OR Effect Estimates Included in the Primary Myopia-GRS.

**eTable 4.** SNPs and Their Log OR Effect Estimates Included in the AD-GRS

**eTable 5.** Associations Between Genetic Risk Scores (Cataracts-GRS, Myopia-GRS, and AD-GRS) With Their Respective Outcomes in UK Biobank

**eTable 6.** Cox Models for the Associations Between Glaucoma, AMD, and Diabetic Retinopathy With All-Cause Dementia, AD, and VaD

**eTable 7.** Association Between Cataracts or Cataracts-GRS and Brain Regions (mm<sup>3</sup>) Associated With Dementia or Vision

**eTable 8.** Association Between Primary GRS (Obtained From the 23andMe Replication Study) for Cataracts or Myopia, and Incident Dementia, AD, and VaD Among Participants Older Than 60 at Baseline

**eTable 9.** Association Between Secondary GRS (Obtained From GERA Cohort) and Incident Dementia, AD, and VaD Among Participants Older Than 60 at Baseline

**eTable 10.** Associations Between AD-GRS, With and Without *APOE*, and Vision Outcomes

**eTable 11.** Summary Reverse Causation MR Estimates for: 1) the Association Between AD and Self-Reported and *ICD* Diagnoses of Cataracts, 2) the Association Between AD and Myopia, and 3) the Association Between AD and Binary 20/40 Vision

**eFigure 1.** Association Between 43 Cataracts SNPs and Both Cataracts and Dementia

**eFigure 2.** Association Between 43 Cataracts SNPs and Both Cataracts and Vascular Dementia

**eFigure 3.** Association Between 27 AD SNPs and Both Cataracts and Dementia

This supplementary material has been provided by the authors to give readers additional information about their work.

**eTable 1. International Classification of Diseases (ICD) codes used to extract additional AD and ADRD diagnoses from primary care and in-patient electronic health records through 2021.**

| Description                                                               | ICD-10 code | Subtype |
|---------------------------------------------------------------------------|-------------|---------|
| Dementia in Alzheimer's disease                                           | F00         | AD      |
| Dementia in Alzheimer's disease with early onset                          | F00.0       | AD      |
| Dementia in Alzheimer's disease with late onset                           | F00.1       | AD      |
| Dementia in Alzheimer's disease, atypical or mixed type                   | F00.2       | AD      |
| Dementia in Alzheimer's disease, unspecified                              | F00.9       | AD      |
| Alzheimer's disease                                                       | G30         | AD      |
| Alzheimer's disease with early onset                                      | G30.0       | AD      |
| Alzheimer's disease with late onset                                       | G30.1       | AD      |
| Other Alzheimer's disease                                                 | G30.8       | AD      |
| Alzheimer's disease unspecified                                           | G30.9       | AD      |
| Vascular dementia                                                         | F01         | ADRD    |
| Vascular dementia of acute onset                                          | F01.0       | ADRD    |
| Multi-infarct dementia                                                    | F01.1       | ADRD    |
| Subcortical vascular dementia                                             | F01.2       | ADRD    |
| Mixed cortical and sub-cortical vascular dementia                         | F01.3       | ADRD    |
| Other vascular dementia                                                   | F01.8       | ADRD    |
| Vascular dementia, unspecified                                            | F01.9       | ADRD    |
| Binswanger's disease                                                      | I67.3       | ADRD    |
| Dementia in Picks disease                                                 | F02.0       | ADRD    |
| Circumscribed brain atrophy                                               | G31.0       | ADRD    |
| Sporadic Creutzfeldt-Jakob disease                                        | A81.0       | ADRD    |
| Dementia in Creutzfeldt-Jacob disease                                     | F02.1       | ADRD    |
| Dementia in Huntington's disease                                          | F02.2       | ADRD    |
| Dementia in Parkinson's disease                                           | F02.3       | ADRD    |
| Dementia in HIV disease                                                   | F02.4       | ADRD    |
| Mental and behavioural disorders due to use of alcohol - amnesic syndrome | F10.6       | ADRD    |
| Dementia in other diseases classified elsewhere                           | F02         | ADRD    |
| Dementia in other specified diseases classified elsewhere                 | F02.8       | ADRD    |
| Unspecified dementia                                                      | F03         | ADRD    |
| Delirium superimposed on dementia                                         | F05.1       | ADRD    |
| Senile degeneration of brain                                              | G31.1       | ADRD    |
| Other specified degenerative diseases of nervous system                   | G31.8       | ADRD    |

Abbreviations: ADRD = Alzheimer disease and related dementias; AD = Alzheimer disease

**eTable 2.** SNPs and their log OR effect estimates included in the primary Cataracts-GRS.

| Variant     | Chromosome | Locus                     | Effect Allele | Effect Estimate |
|-------------|------------|---------------------------|---------------|-----------------|
| rs2073017   | 1          | <i>CASZ1</i>              | C             | -0.0202027      |
| rs3176459   | 1          | <i>CDKN2C</i>             | G             | -0.0202027      |
| rs71646944  | 1          | <i>ADGRL2</i>             | T             | 0.03922071      |
| rs10633030  | 1          | <i>FAM46C</i>             | CT            | 0.0295588       |
| rs2982459   | 1          | <i>LINC00970</i>          | G             | -0.0304592      |
| rs12593     | 1          | <i>ADCK3</i>              | T             | 0.03922071      |
| rs890069    | 2          | <i>Near TRIB2</i>         | T             | -0.0202027      |
| rs10210444  | 2          | <i>PLB1</i>               | A             | 0.03922071      |
| rs7604689   | 2          | <i>LRP1B-KYNU</i>         | C             | -0.0304592      |
| rs62237590  | 3          | <i>RARB</i>               | C             | 0.01980263      |
| rs35256080  | 3          | <i>ATXN7</i>              | AT            | 0.01980263      |
| rs10663094  | 3          | <i>SOX2-OT</i>            | ACT           | 0.04879016      |
| rs72868578  | 4          | <i>C4orf22-BMP3</i>       | A             | 0.06765865      |
| rs7744813   | 6          | <i>KCNQ5</i>              | A             | 0.01980263      |
| rs73015318  | 6          | <i>QKI</i>                | A             | 0.04879016      |
| rs10258092  | 7          | <i>CREB5</i>              | C             | 0.0295588       |
| rs17172647  | 7          | <i>IGFBP3-TNS3</i>        | G             | 0.06765865      |
| rs62621812  | 7          | <i>ZNF800</i>             | A             | 0.11332869      |
| rs12114462  | 8          | <i>BIN3-EGR3</i>          | C             | 0.01980263      |
| rs1679013   | 9          | <i>CDKN2B-DMRTA1</i>      | T             | 0.0295588       |
| rs4742654   | 9          | <i>FKTN-TAL2</i>          | T             | 0.01980263      |
| rs4837205   | 9          | <i>ST6GALNAC4-PIP5KL1</i> | C             | -0.0202027      |
| rs1014607   | 10         | <i>BAMBI-LINC01517</i>    | A             | -0.040822       |
| rs2274224   | 10         | <i>PLCE1</i>              | C             | 0.0295588       |
| rs73386631  | 11         | <i>ODF3-BET1L</i>         | T             | 0.05826891      |
| rs150648223 | 11         | <i>5' LOC338694</i>       | ATTT          | 0.09531018      |
| rs17739338  | 12         | <i>CAPRIN2</i>            | T             | -0.0618754      |
| rs17608087  | 12         | <i>MVK-FAM222A</i>        | G             | 0.04879016      |
| rs7154613   | 14         | <i>STXBP6</i>             | T             | 0.0295588       |
| rs2855530   | 14         | <i>BMP4</i>               | C             | 0.0295588       |
| rs72714121  | 15         | <i>OCA2</i>               | T             | 0.04879016      |
| rs12901945  | 15         | <i>RORA-VPS13C</i>        | A             | 0.01980263      |
| rs10500355  | 16         | <i>RBFOX1</i>             | A             | 0.03922071      |
| rs73530148  | 16         | <i>ALDOA</i>              | T             | 0.03922071      |
| rs73568154  | 16         | <i>WWP2</i>               | A             | 0.01980263      |
| rs8074331   | 17         | <i>RHOT1 - RHBDL3</i>     | A             | -0.0202027      |

| <b>Variant</b> | <b>Chromosome</b> | <b>Locus</b>          | <b>Effect Allele</b> | <b>Effect Estimate</b> |
|----------------|-------------------|-----------------------|----------------------|------------------------|
| rs7207025      | 17                | <i>near MIR2117HG</i> | A                    | -0.0202027             |
| rs9038         | 17                | <i>9-Sep</i>          | C                    | -0.040822              |
| rs9895741      | 17                | <i>NPLOC4</i>         | G                    | -0.0512933             |
| rs75954926     | 17                | <i>3' METRNL</i>      | G                    | 0.0295588              |
| rs61744414     | 19                | <i>CPAMD8</i>         | T                    | 0.09531018             |
| rs549768142    | 20                | <i>JAG1</i>           | GAAAAAAAAAAT         | -0.040822              |
| rs4814857      | 20                | <i>SLC24A3</i>        | G                    | 0.0861777              |

Abbreviations: GRS = genetic risk score; SNP = single nucleotide polymorphism

**eTable 3. SNPs and their log OR effect estimates included in the primary Myopia-GRS.**

| Variant    | Chromosome | Position  | Effect Allele | Effect Estimate |
|------------|------------|-----------|---------------|-----------------|
| rs2808515  | 1          | 200346324 | G             | 0.0707          |
| rs2017760  | 1          | 207455421 | G             | -0.1036         |
| rs300751   | 2          | 209063    | C             | -0.0774         |
| rs9309272  | 2          | 56095366  | T             | 0.127           |
| rs61049169 | 2          | 146888708 | A             | -0.0755         |
| rs192716   | 2          | 157376472 | C             | -0.0829         |
| rs2573081  | 2          | 178828507 | G             | 0.0646          |
| rs1550094  | 2          | 233385396 | A             | -0.1004         |
| rs14165    | 3          | 53847408  | G             | 0.0779          |
| rs6549043  | 3          | 85632126  | T             | 0.0739          |
| rs6767786  | 3          | 141104180 | A             | -0.0664         |
| rs74764079 | 4          | 81952637  | A             | 0.2958          |
| rs1309551  | 5          | 64288656  | G             | -0.0693         |
| rs7730838  | 5          | 71708698  | T             | -0.0627         |
| rs7444298  | 5          | 87730027  | G             | 0.0846          |
| rs11758482 | 6          | 2438231   | G             | 0.0927          |
| rs4145443  | 6          | 22068174  | T             | 0.0729          |
| rs2207136  | 6          | 50809720  | C             | -0.0689         |
| rs7744813  | 6          | 73643289  | A             | 0.1006          |
| rs12193446 | 6          | 129820038 | G             | -0.2244         |
| rs6465760  | 7          | 99591418  | A             | 0.069           |
| rs12234576 | 7          | 158928375 | A             | -0.1062         |
| rs16890057 | 8          | 40726582  | A             | -0.0794         |
| rs72621438 | 8          | 60178580  | G             | -0.1064         |
| rs9643433  | 8          | 78952371  | A             | -0.0708         |
| rs62538956 | 9          | 12679244  | C             | 0.1016          |
| rs11145746 | 9          | 71834380  | A             | 0.0969          |
| rs7042950  | 9          | 77149837  | G             | 0.0919          |
| rs10826198 | 10         | 60274182  | T             | 0.0731          |
| rs12778014 | 10         | 94950273  | A             | -0.0835         |
| rs807037   | 10         | 102824349 | C             | 0.0695          |
| rs56299331 | 10         | 114788436 | T             | 0.0811          |
| rs6484385  | 11         | 28668416  | C             | 0.0744          |
| rs11602008 | 11         | 40149305  | T             | 0.1204          |
| rs11226856 | 11         | 105699048 | G             | 0.0918          |
| rs5442     | 12         | 6954864   | A             | 0.1439          |

| Variant    | Chromosome | Position  | Effect Allele | Effect Estimate |
|------------|------------|-----------|---------------|-----------------|
| rs1468993  | 12         | 46155145  | C             | 0.0786          |
| rs3138142  | 12         | 56115585  | T             | -0.1191         |
| rs11178462 | 12         | 71269789  | A             | -0.1055         |
| rs1328371  | 13         | 93912785  | C             | -0.066          |
| rs34217772 | 14         | 42273570  | G             | 0.0967          |
| rs34935520 | 14         | 61091401  | A             | -0.0772         |
| rs35337422 | 14         | 104407243 | C             | 0.1109          |
| rs524952   | 15         | 35005886  | A             | 0.1713          |
| rs75227249 | 15         | 48763008  | T             | -0.1161         |
| rs1007365  | 15         | 79379492  | G             | 0.0853          |
| rs8039459  | 15         | 82320426  | G             | 0.0755          |
| rs17648524 | 16         | 7459683   | C             | 0.0878          |
| rs4635359  | 16         | 80537760  | C             | -0.078          |
| rs2908972  | 17         | 11407259  | A             | 0.0886          |
| rs62067167 | 17         | 31251711  | T             | 0.1156          |
| rs7222840  | 17         | 47280915  | C             | 0.0851          |
| rs12603264 | 17         | 54729518  | T             | 0.0765          |
| rs4793501  | 17         | 68718734  | T             | 0.0996          |
| rs734559   | 18         | 72179579  | A             | -0.0811         |

Abbreviations: GRS = genetic risk score; SNP = single nucleotide polymorphism

**eTable 4. SNPs and their log OR effect estimates included in the AD-GRS.**

| Variant     | Chromosome | Locus            | Effect Allele | Effect Estimate |
|-------------|------------|------------------|---------------|-----------------|
| rs4844610   | 1          | <i>CR1</i>       | A             | 0.157           |
| rs6733839   | 2          | <i>BIN1</i>      | T             | 0.182           |
| rs10933431  | 2          | <i>INPP5D</i>    | G             | -0.094          |
| rs9271058   | 6          | <i>HLA -DRB1</i> | A             | 0.095           |
| rs75932628  | 6          | <i>TREM2</i>     | T             | 0.732           |
| rs9473117   | 6          | <i>CD2AP</i>     | C             | 0.086           |
| rs114812713 | 6          | <i>OARD1</i>     | C             | 0.278           |
| rs12539172  | 7          | <i>NYAP1</i>     | T             | -0.083          |
| rs10808026  | 7          | <i>EPHA1</i>     | A             | -0.105          |
| rs73223431  | 8          | <i>PTK2B</i>     | T             | 0.095           |
| rs9331896   | 8          | <i>CLU</i>       | C             | -0.128          |
| rs7920721   | 10         | <i>ECHDC3</i>    | G             | 0.077           |
| rs3740688   | 11         | <i>SPI1</i>      | G             | -0.083          |
| rs7933202   | 11         | <i>MS4A2</i>     | C             | -0.117          |
| rs3851179   | 11         | <i>PICALM</i>    | T             | -0.128          |
| rs11218343  | 11         | <i>SORL1</i>     | C             | -0.223          |
| rs17125924  | 14         | <i>FERMT2</i>    | G             | 0.131           |
| rs12881735  | 14         | <i>SLC24A4</i>   | C             | -0.083          |
| rs593742    | 15         | <i>ADAM10</i>    | G             | -0.073          |
| rs7185636   | 16         | <i>IQCK</i>      | C             | -0.083          |
| rs62039712  | 16         | <i>WWOX</i>      | A             | 0.148           |
| rs138190086 | 17         | <i>ACE</i>       | A             | 0.262           |
| rs3752246   | 19         | <i>ABCA7</i>     | G             | 0.140           |
| rs429358    | 19         | <i>APOE</i>      | C             | 1.351           |
| rs7412      | 19         | <i>APOE</i>      | T             | -0.386          |
| rs6024870   | 20         | <i>CASS4</i>     | A             | -0.128          |
| rs2830500   | 21         | <i>ADAMTS1</i>   | A             | -0.073          |

Abbreviations: GRS = genetic risk score; SNP = single nucleotide polymorphism

**eTable 5. Associations between genetic risk scores (Cataracts-GRS, Myopia-GRS, and AD-GRS) with their respective outcomes in UK Biobank. Models include adjustment for age, sex, and first 10 principal components.**

| Genetic Risk Score         | Outcome                                      | n       | Adjusted OR (95% CI) |
|----------------------------|----------------------------------------------|---------|----------------------|
| <i>Primary Analysis</i>    |                                              |         |                      |
| Primary Cataracts-GRS      | Self-Reported Cataracts                      | 150,858 | 1.18<br>(1.16-1.21)  |
| Primary Cataracts-GRS      | Self-Reported and ICD Diagnoses of Cataracts | 150,858 | 1.21<br>(1.19-1.23)  |
| Primary Myopia-GRS         | Assessment-Derived Myopia                    | 34,157  | 1.44<br>(1.40-1.47)  |
| AD-GRS                     | Incident ADRD                                | 183,439 | 1.80<br>(1.76-1.84)  |
| <i>Secondary Analyses</i>  |                                              |         |                      |
| Secondary Cataracts-GRS    | Self-Reported Cataracts                      | 183,439 | 1.05<br>(1.03-1.07)  |
| Secondary Cataracts-GRS    | Self-Reported and ICD Diagnoses of Cataracts | 183,439 | 1.05<br>(1.04-1.06)  |
| Secondary Myopia-GRS       | Assessment-Derived Myopia                    | 40,665  | 0.72<br>(0.71-0.74)  |
| AD-GRS without <i>APOE</i> | Incident ADRD                                | 183,439 | 1.20<br>(1.17-1.24)  |

Abbreviations: GRS = genetic risk score; ADRD = Alzheimer disease and related dementias; AD = Alzheimer disease, *APOE* = apolipoprotein E (*APOE*) gene



**eTable 6. Cox models for the associations between glaucoma, AMD, and diabetic retinopathy with all-cause dementia, AD, and VaD.** Models include adjustment for: age at visit, self-reported sex, self-reported racial and ethnic identity, index of multiple deprivation by country of origin, and binary indicators for history of falls, broken bones, cardiovascular disease, stroke, diabetes, and problems hearing.

| Eye condition                          | n       | All-Cause Dementia<br>HR (95% CI) | AD<br>HR (95% CI)   | VaD<br>HR (95% CI)  |
|----------------------------------------|---------|-----------------------------------|---------------------|---------------------|
| Glaucoma                               | 280,527 | 1.13<br>(0.98-1.30)               | 1.00<br>(0.76-1.30) | 1.25<br>(0.91-1.74) |
| Age-related<br>Macular<br>Degeneration | 280,527 | 1.17<br>(0.97-1.41)               | 0.94<br>(0.65-1.35) | 1.25<br>(0.80-1.95) |
| Diabetic<br>Retinopathy                | 280,527 | 1.63<br>(1.40-1.91)               | 1.41<br>(1.00-1.97) | 1.77<br>(1.30-2.41) |

Abbreviations: AD = Alzheimer disease, AMD = age-related macular degeneration, VaD = vascular dementia

**eTable 7. Association between cataracts or cataracts-GRS and brain regions (mm<sup>3</sup>) associated with dementia or vision.** Models for cataracts include adjustment for: age at visit, self-reported sex, self-reported racial and ethnic identity, index of multiple deprivation by country of origin, binary indicators for history of comorbidities (falls, broken bones, cardiovascular disease, stroke, diabetes, and problems hearing), and imaging center. Models for cataracts-GRS include adjustment for: age, sex, first 10 principal components, and imaging center.

| <b>Exposure</b>                    | <b>Brain Region</b>                             | <b>Coefficient (mm<sup>3</sup>) (95% CI)</b> |
|------------------------------------|-------------------------------------------------|----------------------------------------------|
| Self-reported Cataracts (n=33,271) | Total brain volume <sup>a</sup>                 | -1515.33 (-4351.56, 1320.91)                 |
|                                    | Total grey matter volume <sup>a</sup>           | <b>-2483.27 (-4225.21, -741.34)</b>          |
|                                    | Hippocampal volume <sup>a</sup>                 | -27.11 (-69.47, 15.25)                       |
|                                    | White matter hyperintensity volume <sup>a</sup> | <b>531.00 (79.87, 982.13)</b>                |
|                                    | AD-Signature Region                             | -0.01 (-0.01, 7e-04)                         |
|                                    | Lateral occipital volume <sup>a</sup>           | <b>-243.47 (-416.81, -70.12)</b>             |
| Cataracts-GRS (n= 26,051)          | Total brain volume <sup>a</sup>                 | <b>-597.432 (-1077.87, -117.00)</b>          |
|                                    | Total grey matter volume <sup>a</sup>           | <b>-375.17 (-680.10, -70.24)</b>             |
|                                    | Hippocampal volume <sup>a</sup>                 | -4.28 (-11.90, 3.33)                         |
|                                    | White matter hyperintensity volume <sup>a</sup> | 7.60 (-75.67, 90.88)                         |
|                                    | AD-Signature Region                             | -0.0005 (-0.002, 8e-04)                      |
|                                    | Lateral occipital volume <sup>a</sup>           | 26.45 (-6.21, 49.75)                         |

<sup>a</sup>Additionally adjusted for intracranial volume.

Abbreviations: GRS = genetic risk score; AD = Alzheimer disease

**eTable 8. Association between primary GRS (obtained from the 23andMe replication study) for cataracts or myopia, and incident dementia, AD, and VaD among participants older than 60 at baseline. Models adjusted for age, sex, and first 10 principal components.**

| Exposure                | Outcome            | n       | Adjusted OR (95% CI)    |
|-------------------------|--------------------|---------|-------------------------|
| Cataracts-GRS           | All-cause dementia | 150,858 | 1.02 (0.99-1.05)        |
| Cataracts-GRS           | AD                 | 150,858 | 1.00 (0.96-1.05)        |
| Cataracts-GRS           | VaD                | 150,858 | <b>1.09 (1.03-1.16)</b> |
| Myopia-GRS <sup>a</sup> | All-cause dementia | 150,765 | 1.00 (0.97-1.03)        |
| Myopia-GRS <sup>a</sup> | AD                 | 150,765 | 1.01 (0.97-1.06)        |
| Myopia-GRS <sup>a</sup> | VaD                | 150,765 | 1.01 (0.95-1.07)        |

<sup>a</sup>Additionally adjusted for glasses use.

Abbreviations: GRS = genetic risk score; AD = Alzheimer disease, VaD = vascular dementia

**eTable 9. Association between secondary GRS (obtained from GERA cohort) and incident dementia, AD, and VaD among participants older than 60 at baseline. Models adjusted for age, sex, and first 10 principal components.**

| <b>Exposure</b>         | <b>Outcome</b>     | <b>n</b> | <b>Adjusted OR (95% CI)</b> |
|-------------------------|--------------------|----------|-----------------------------|
| Cataracts-GRS           | All-cause dementia | 183,439  | <b>1.23 (1.20-1.26)</b>     |
| Cataracts-GRS           | AD                 | 183,439  | <b>1.30 (1.25-1.35)</b>     |
| Cataracts-GRS           | VaD                | 183,439  | <b>1.20 (1.14-1.26)</b>     |
| Myopia-GRS <sup>a</sup> | All-cause dementia | 183,320  | 1.01 (0.99-1.04)            |
| Myopia-GRS <sup>a</sup> | AD                 | 183,320  | 1.03 (0.99-1.07)            |
| Myopia-GRS <sup>a</sup> | VaD                | 183,320  | 0.96 (0.91-1.01)            |

<sup>a</sup>Additionally adjusted for glasses use.

Abbreviations: GRS = genetic risk score; AD = Alzheimer disease, VaD = vascular dementia

**eTable 10. Associations between AD-GRS, with and without APOE, and vision outcomes.** Models adjusted for age, sex, and first 10 principal components.

| Outcome                                      | n       | Adjusted OR (95% CI)              | Adjusted OR without APOE (95% CI) |
|----------------------------------------------|---------|-----------------------------------|-----------------------------------|
| Self-Reported Cataracts                      | 183,439 | 1.00<br>(0.98-1.02)               | 0.98<br>(0.96-1.00)               |
| Self-Reported and ICD Diagnoses of Cataracts | 183,439 | 0.99<br>(0.98-1.00)               | <b>0.98</b><br><b>(0.97-0.99)</b> |
| Myopia                                       | 40,687  | <b>0.97</b><br><b>(0.95-0.99)</b> | 0.98<br>(0.96-1.01)               |
| Binary 20/40 Vision                          | 41,646  | 0.97<br>(0.92-1.02)               | 1.00<br>(0.95-1.05)               |

Abbreviations: GRS = genetic risk score; AD = Alzheimer disease, APOE = apolipoprotein E (APOE) gene

**eTable 11. Summary reverse causation MR estimates for: 1) the association between AD and self-reported and ICD diagnoses of cataracts, 2) the association between AD and myopia, and 3) the association between AD and binary 20/40 vision. Models adjusted for age, sex, and first 10 principal components to proxy for genetic ancestry.**

| MR Estimate                                                                | OR (95% CI)      |
|----------------------------------------------------------------------------|------------------|
| <b>MR estimate of AD on visual impairment (reverse causality)</b>          |                  |
| 1. Association between AD and self-reported and ICD diagnoses of cataracts |                  |
| IVW                                                                        | 0.99 (0.96-1.01) |
| MR-Egger                                                                   | 0.99 (0.96-1.03) |
| Weighted-Median                                                            | 0.99 (0.97-1.01) |
| Weighted-Mode                                                              | 1.00 (0.97-1.01) |
| 2. Association between AD and myopia                                       |                  |
| IVW                                                                        | 0.96 (0.92-1.00) |
| MR-Egger                                                                   | 0.98 (0.93-1.03) |
| Weighted-Median                                                            | 0.96 (0.93-0.99) |
| Weighted-Mode                                                              | 0.97 (0.94-1.01) |
| 3. Association between AD and binary 20/40 vision                          |                  |
| IVW                                                                        | 0.93 (0.86-1.00) |
| MR-Egger                                                                   | 0.96 (0.88-1.05) |
| Weighted-Median                                                            | 0.95 (0.88-1.03) |
| Weighted-Mode                                                              | 0.95 (0.88-1.03) |

Abbreviations: AD = Alzheimer disease, MR = Mendelian randomization

**eFigure 1. Association between 43 cataracts SNPs and both cataracts and dementia.** MR estimates for the effect of cataracts (primary) are shown for inverse variance weighted (IVW), MR-Egger (which adjusts for pleiotropy), weighted-median, and weighted-mode.

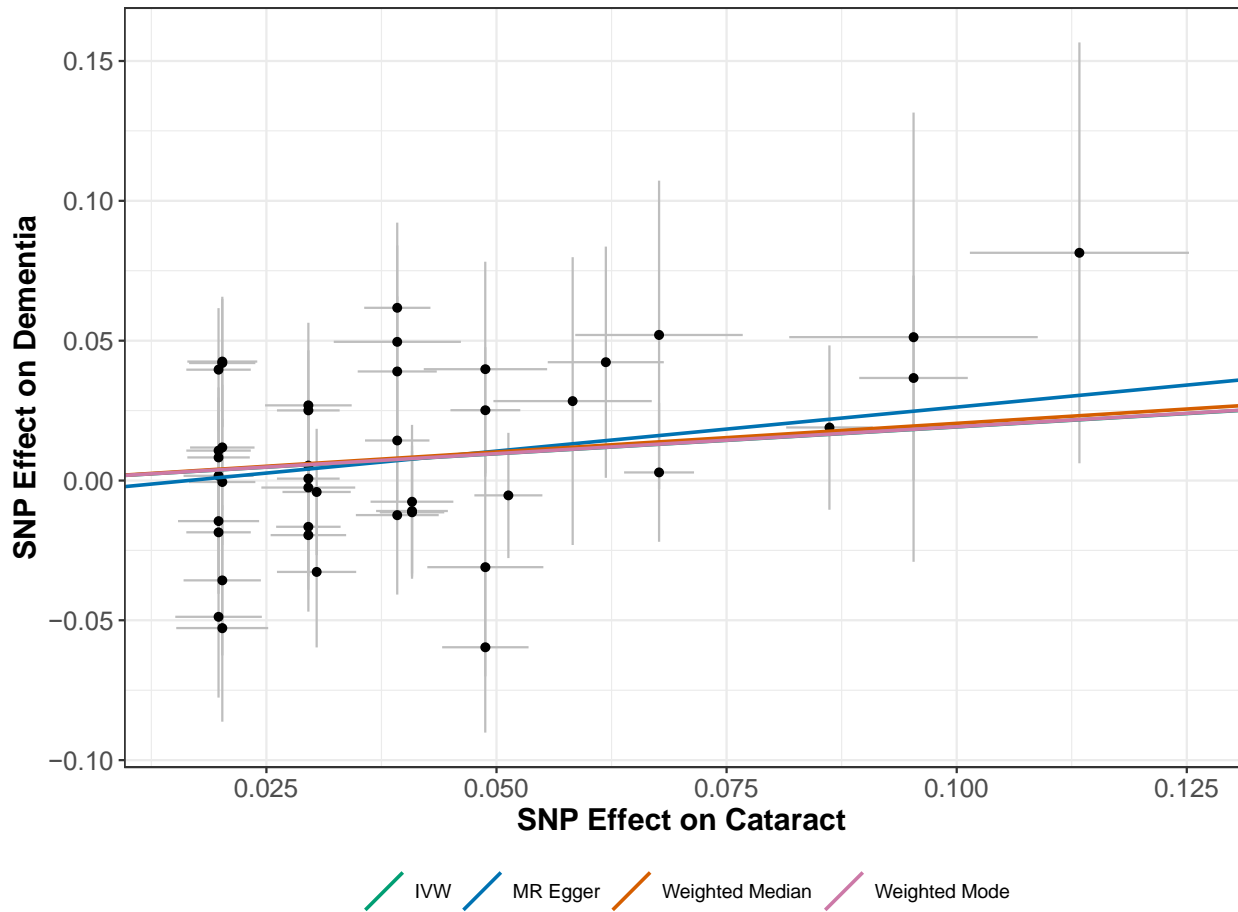

**eFigure 2. Association between 43 cataracts SNPs and both cataracts and vascular dementia.** MR estimates for the effect of cataracts (primary) are shown for inverse variance weighted (IVW), MR-Egger (which adjusts for pleiotropy), weighted-median, and weighted-mode.

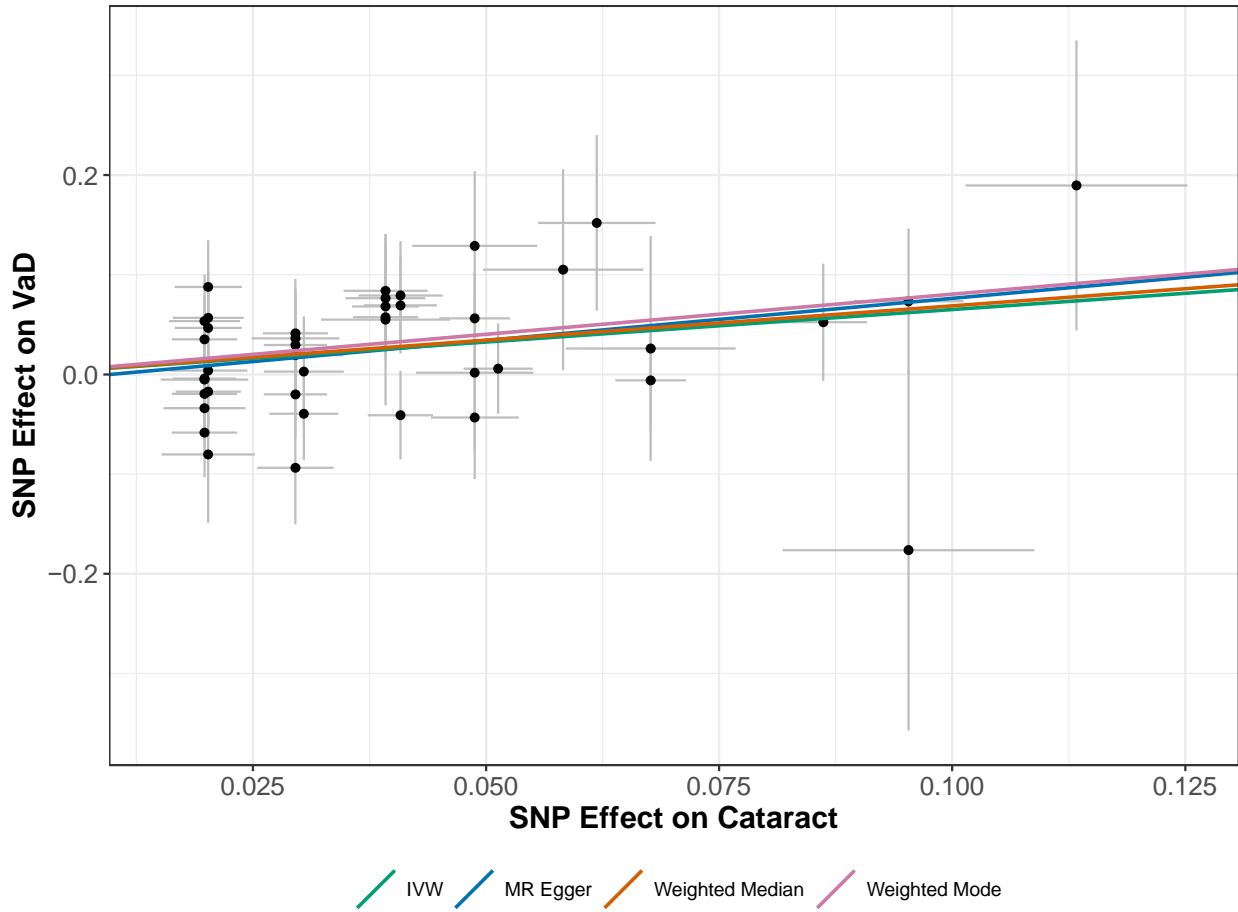



**Figure 3. Association between 27 AD SNPs and both cataracts and dementia.** MR estimates for the effect of AD on cataract are shown for inverse variance weighted (IVW), MR-Egger (which adjusts for pleiotropy), weighted-median, and weighted-mode.

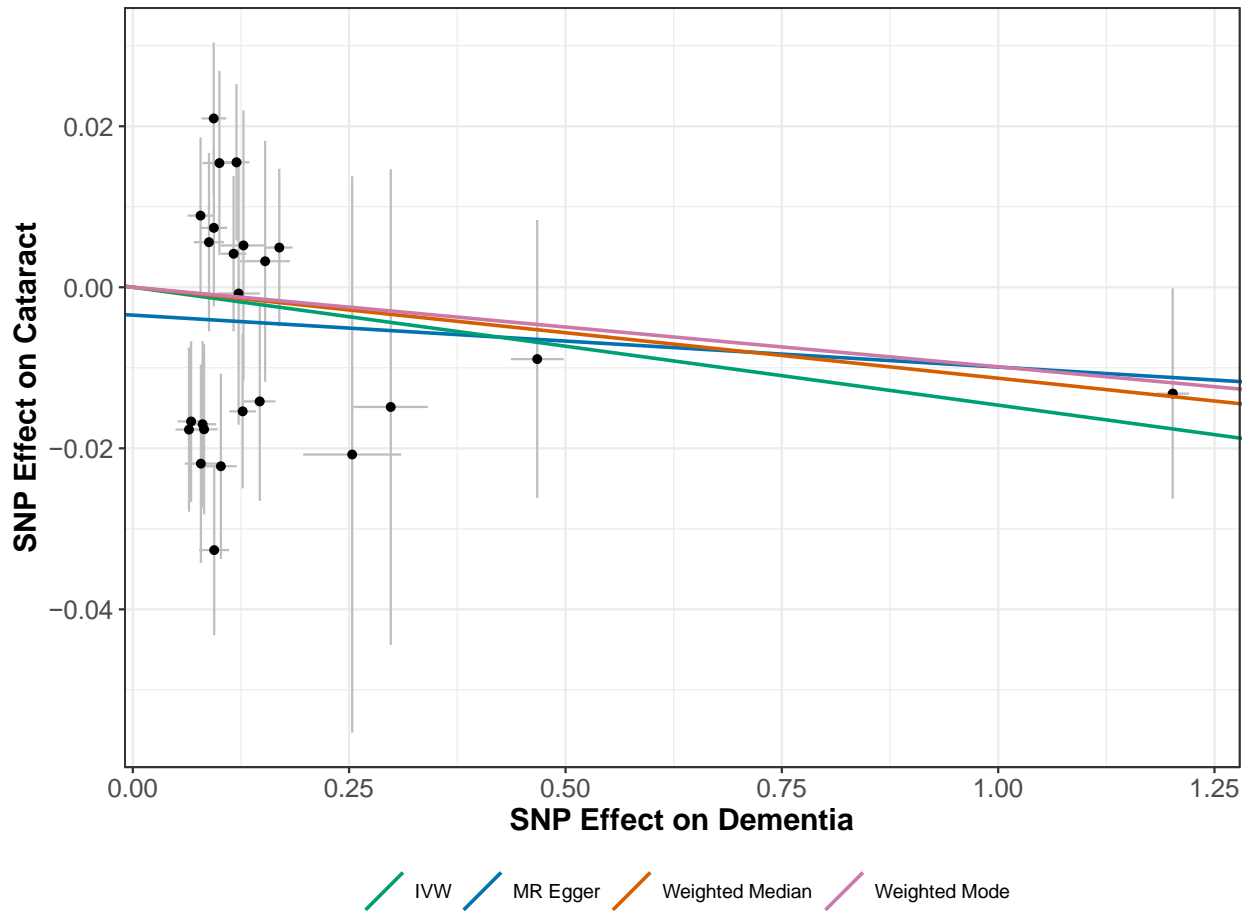

Supplement: jamanetwopen-e2424539-s001.pdf [file jamanetwopen-e2424539-s001.pdf]
