# Supplementary material for: Visual Impairment, Eye Conditions, and Diagnoses of Neurodegeneration and Dementia
Source: PubMed Central journal article supplement (PMC11289698; doi:10.1001/jamanetworkopen.2024.24539), 2024-07-30
Supplement: jamanetwopen-e2424539-s002.pdf [file jamanetwopen-e2424539-s002.pdf]

## Data Sharing Statement

Ferguson. Visual Impairment, Eye Conditions, and Diagnoses of Neurodegeneration and Dementia. *JAMA Netw Open*. Published July 30, 2024.

doi:10.1001/jamanetworkopen.2024.24539

### Data

**Data available:** No

### Additional Information

**Explanation for why data not available:** Researchers can apply to access the data used in this study from UK Biobank (<http://www.ukbiobank.ac.uk/>).
